# Supplementary figures and images for: Epidemiological Study of Violence against Children and Its Increase during the COVID-19 Pandemic
Source: MDPI journal article supplement (doi:10.3390/ijerph181910061), 2021-09-24

# Self-inflicted Violence Rate Evolution

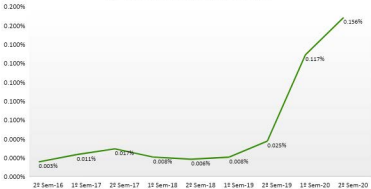

Supplement: s1 [file s1]
